# Supplementary material for: A fully biocompatible and biodegradable triboelectric nanogenerator based on PVA/chitosan fibers and PLA fibers with enhanced output performance
Source: Royal Society of Chemistry journal article supplement (doi:10.1039/d5tc03882k), 2025-12-30
Supplement: d5tc03882k1.pdf [file d5tc03882k1.pdf]

## Supporting Information

### **Fully biocompatible and biodegradable triboelectric nanogenerator based on PVA/Chitosan fibers and PLA fibers with enhanced output performance**

Vida Sabzevari<sup>a</sup>, Mohammad Mahdi Abolhasani<sup>a,\*</sup>, Sara Azimi<sup>a,b</sup>

<sup>a</sup> Chemical Engineering Department, University of Kashan, 8731753153, Kashan, Iran.

<sup>b</sup> Faculty of Petroleum and Chemical Engineering, University of Hormozgan, 7916193145, Bandar Abbas, Iran.

\*Corresponding Author

\*E-mail: [abolhasani@kashanu.ac.ir](mailto:abolhasani@kashanu.ac.ir)

**Note S1:**

We have employed the well-established series capacitor model for TENGs to calculate surface charge density ( $\sigma$ ). The  $V_{OC}$  of a TENG with two dielectric layers in series is [1]:

$$V_{OC} = \frac{\sigma d_1}{\epsilon_0 \epsilon_{r1}} + \frac{\sigma d_2}{\epsilon_0 \epsilon_{r2}} \quad (S1)$$

where  $d$  and  $\epsilon_r$  are the thickness and relative permittivity of each layer. Solving for  $\sigma$  yields:

$$\sigma = \frac{V_{OC}}{\frac{\sigma d_1}{\epsilon_0 \epsilon_{r1}} + \frac{\sigma d_2}{\epsilon_0 \epsilon_{r2}}} \quad (S2)$$

For TENG based on PVA/Chitosan fiber and PLA fiber, the effective permittivity of PVA/Chitosan layer ( $\epsilon_{r1}$ ) has been calculated using the linear mixing rule based on volume fractions. The volume fraction of PVA ( $\phi_{PVA}$ ) has been derived from the known mass fraction ( $W_{PVA}=65\%$ ) and the material densities ( $\rho_{PVA}=1.19 \text{ g/cm}^3$ ,  $\rho_{Chitosan}=1.75 \text{ g/cm}^3$ ):

$$\phi_{PVA} = \frac{\frac{W_{PVA}}{\rho_{PVA}}}{\frac{W_{PVA}}{\rho_{PVA}} + \frac{W_{Chitosan}}{\rho_{Chitosan}}} \quad (S3)$$

Then, the effective permittivity of PVA/Chitosan layer ( $\epsilon_{r1}$ ) has been calculated as:

$$\epsilon_{r1} = \phi_{PVA} \times \epsilon_{PVA} + \phi_{Chitosan} \times \epsilon_{Chitosan} \quad (S4)$$

Using established literature values  $\epsilon_{PVA}=6.0$ ,  $\epsilon_{Chitosan}=10.0$ , and  $\epsilon_{PLA}=3$  [2-4] with layer thicknesses of  $50 \text{ }\mu\text{m}$  for both samples, the calculation gives  $\epsilon_{r1} \approx 7.1$ . Applying Equation (S1) with the

measured  $V_{OC}=23.34$  V for PVA/Chitosan fiber-based TENG, the calculated surface charge density is obtained as  $9.10 \mu\text{C}/\text{m}^2$ . To isolate the effect of the blend, we have performed the same calculation for the TENG based on pure PVA fiber. With the generated  $V_{OC}$  of 6.51 V. the calculation yields surface charge density of  $2.54 \mu\text{C}/\text{m}^2$ .

**Table S1.** Mass loss of the assembled bilayer sample during biodegradation in PBS buffer over time.

| Immersion Time (Days) | Average Mass Loss of Sample (%) |
|-----------------------|---------------------------------|
| 10                    | 9                               |
| 20                    | 42                              |
| 40                    | 75                              |
| 60                    | 96                              |

## References

1. Niu, S., et al., *Theoretical study of contact-mode triboelectric nanogenerators as an effective power source*. Energy & Environmental Science, 2013. **6**(12): p. 3576-3583.
2. Камалов, A.M., et al., *Electrophysical properties of chitosan-based composite films filled with single-wall carbon nanotubes*. Physics of Complex Systems, 2022. **3**(2): p. 60–65-60–65.
3. Uddin, M.J., et al., *High dielectric permittivity and percolative behavior of polyvinyl alcohol/potassium dihydrogen phosphate composites*. Journal of applied polymer science, 2012. **125**(3): p. 2363-2370.
4. Wu, W., et al., *Significantly improved dielectric properties of polylactide nanocomposites via TiO<sub>2</sub> decorated carbon nanotubes*. Composites Part A: Applied Science and Manufacturing, 2019. **127**: p. 105650.
